# Supplementary material for: Artificial trans-encoded small non-coding RNAs specifically silence the selected gene expression in bacteria
Source: PubMed Central journal article supplement — Nucleic Acids Res. 2011 Feb 3;39(8):e50. doi: 10.1093/nar/gkr034 (PMC3082891; doi:10.1093/nar/gkr034), 2011-02-03
Supplement: supp_gkr034_revised_supplementary_data.pdf [file supp_gkr034_revised_supplementary_data.pdf]

**TITLE PAGE**

**Artificial *trans*-encoded small noncoding RNAs specifically silence the selected gene expression in bacteria**

**Shuai Man<sup>#</sup>, Rubin Cheng<sup>#</sup>, Cuicui Miao, Qianhong Gong, Yuchao Gu, Xinzhi Lu, Feng Han, and Wengong Yu\***

Key Laboratory of Marine Drugs, Chinese Ministry of Education; Key Laboratory of Glycoscience & Glycotechnology of Shandong Province; School of Medicine and Pharmacy, Ocean University of China, 5 Yushan Road, Qingdao 266003, China.

# These authors contributed equally to this work.

\*To whom correspondence should be addressed. Tel: +86-532-82031680. Fax: +86-532-82033054. E-mail: yuwg66@ouc.edu.cn

Keywords: atsRNA, bacteria, gene silencing, trans-encoded sRNA

## Supplementary Figures

**Figure S1.** The common structural characteristics of well-known bacterial *trans*-encoded sRNAs.

**Figure S2.** Effect of atsRNA on growth rate of the host bacteria *E. coli*.

**Figure S3.** Effect of atsRNA on non-target gene.

**Figure S4.** The base-pairing schemes for atsRNA (including GY series and CY series) and target mRNA.

**Figure S5.** Predicted secondary structure of atsRNA targeting EGFP and *uidA* gene.

**Figure S6.** The base-pairing schemes for atsRNAs (including CY4, L-CY4, CY6 and L-CY6) and their target *uidA* mRNA.

**Figure S7.** The amount and relative interference efficiency of CY4, CY6 and their corresponding atsRNA mutants.

**Figure S8.** The base-pairing schemes for atsRNA (including CY9, CY9-L1, CY9-L2, CY9-L3 and CY9-L4) and their target *uidA* mRNA.

**Figure S9.** The amount and relative interference efficiency of CY9 and CY9 mutants.

**Figure S10.** The stability and relative interference efficiency of atsRNAs CY1 and N-CY1.

**Figure S11.** The stability and relative interference efficiency of GY2, CY9 and their corresponding mRNA basepairing region null atsRNA mutants.

**Figure S12.** The stability and relative interference efficiency of GY2, CY9 and their corresponding Hfq binding site null atsRNA mutants.

**Figure S13.** Effect of atsRNAs on target gene in hfq mutant strain after the transformation of a multicopy plasmid containing hfq gene.

**Figure S14.** Affinity of Hfq for atsRNA revealed by gel mobility shift assays.

**Figure S15.** The interaction of atsRNA and target mRNA in vitro with or without the aid of Hfq revealed by gel mobility shift assays.

**Figure S16.** Quantitative real-time PCR analysis of *uidA* mRNA in HAT103 (temperature sensitive *rne-1* mutant strain) containing *rne* gene when it was cultured at 42°C.

**Figure S17.** Predicted secondary structure of atsRNAs targeting against identified essential genes.

**Figure S18.** Quantitative real-time PCR analysis of target mRNA in MC4100.

**Figure S19.** Effect of atsRNAs on *hla* gene in *S. aureus*.

**Figure S20.** Effect of atsRNAs on SEA gene in *S. aureus*.

**Figure S21.** Effect of atsRNA on growth rate of the host bacteria *S. aureus*.

## Supplementary Figures Legends

**Figure S1.** The common structural characteristics of well-known bacterial *trans*-encoded sRNAs. The sRNAs contained roughly three parts: mRNA basepairing region (red), Hfq binding site (blue) and Rho-independent terminator (pink). At certain instances, two parts of the sRNAs are intertwined together. Overlapped area between mRNA basepairing region and Hfq binding site is in green, and that between Hfq binding site and Rho-independent terminator is in gray. The corresponding target mRNAs for the highlighted mRNA basepairing regions of natural *trans*-encoded

sRNAs are as follows: *sodB* mRNA for RyhB, *flhA* mRNA for OxyS, *rpoS* mRNA for DsrA, *galK* mRNA for Spot42, *ompF* mRNA for MicF, *hapR* mRNA for Qrr1, respectively.

**Figure S2.** Effect of atsRNA on growth rate of the host bacteria. Growth curve of host bacteria MC4100 after the expression of atsRNAs targeting against EGFP gene (A) or *uidA* gene (B), respectively. Bacterial cells containing empty vector pRI were used as the control. Cells were grown in LB media with appropriate antibiotics at 30°C. Turbidity of the cultures was monitored at 600 nm.

**Figure S3.** Effect of atsRNA on non-target genes. (A) Effect of CY series atsRNAs on EGFP gene in MC4100. The fluorescence was measured after the expression of atsRNA was induced with 1 mM IPTG for 30 min. (B) Effect of GY series atsRNAs on *uidA* gene in MC4100. The activity of beta-glucuronidase was assayed after the expression of atsRNA was induced with 1 mM IPTG for 30 min. Bacterial cells containing the empty vector pRI were used as the control. Average values were from triplicate experiments with std values indicated.

**Figure S4.** The base-pairing schemes for atsRNA and target mRNA. (A) Hybrids between GY series atsRNAs and EGFP mRNA. (B) Hybrids between CY series atsRNAs and *uidA* mRNA. For each hybrid, the lower part shows the region of atsRNA that pairs with target mRNA (upper). The base-pairing sequences between atsRNAs and target mRNAs were predicted by LALIGN and the thermodynamic pairing energies were calculated by DINAMelt. The Shine–Dalgarno (SD) sequences (indicated with arrows) and translation start codons (indicated with asterisks) are shown.

**Figure S5.** The predicted secondary structure of atsRNA targeting against EGFP gene and *uidA* gene. The GY series atsRNAs were designed to target against EGFP gene (A) and the CY series atsRNAs were designed to target against *uidA* gene (B). The sequences of predicted pairing region (indicated with arrows) and Hfq binding site (indicated with asterisks) of atsRNA are marked. The detailed sequences of these atsRNAs were listed in Table S1. The secondary structure of atsRNA is predicted at 37°C by MFOLD program.

**Figure S6.** The base-pairing schemes for atsRNAs (including CY4, L-CY4, CY6 and L-CY6) and their target *uidA* mRNA. For each hybrid, the lower part shows the region of atsRNA that pairs with target mRNA (upper). The base-pairing sequences between atsRNAs and target mRNAs were predicted by LALIGN and the thermodynamic pairing energies were calculated by DINAMelt. The Shine–Dalgarno (SD) sequences (indicated with arrows) and translation start codons (indicated with asterisks) are shown.

**Figure S7.** The amount and relative interference efficiency of CY4, CY6 and their corresponding atsRNA mutants. (A) The amounts of atsRNAs analyzed by Northern blot. Total RNAs were purified from cells after the expression of atsRNAs were induced with 1 mM IPTG for 30 min and analyzed using probes specific for atsRNAs and 5S rRNA respectively. (B) The relative interference efficiency of atsRNAs. We obtained the relative interference efficiency of each atsRNAs by normalizing the interference efficiency to relative RNA amounts.

**Figure S8.** The base-pairing schemes for *atsRNA* (including CY9, CY9-L1, CY9-L2, CY9-L3 and CY9-L4) and their target *uidA* mRNA. For each hybrid, the lower part shows the region of *atsRNA* that pairs with target mRNA (upper). The base-pairing sequences between *atsRNAs* and target mRNAs were predicted by LALIGN and the thermodynamic pairing energies were calculated by DINAMelt. The Shine–Dalgarno (SD) sequences (indicated with arrows) and translation start codens (indicated with asterisks) are shown.

**Figure S9.** The amount and relative interference efficiency of CY9 and CY9 mutants. (A) The amounts of *atsRNAs* analyzed by Northern blot. Total RNAs were purified from cells after the expression of *atsRNAs* were induced with 1 mM IPTG for 30 min and analyzed using probes specific for CY9 and 5S rRNA respectively. (B) The relative interference efficiency of *atsRNAs*. We obtained the relative interference efficiency of each *atsRNAs* by normalizing the interference efficiency to relative RNA amounts.

**Figure S10.** The stability and relative interference efficiency of *atsRNAs* CY1 and N-CY1. (A) The stability of CY1 and N-CY1 analyzed by Northern blot. The expression of *atsRNAs* was induced with 1 mM IPTG for 30 min, and then rifampicin was added. The incubation was continued further and cells were harvested at the indicated time points for RNA preparation. Total RNA was analyzed using probes specific for CY1, N-CY1 and 5S rRNA respectively. The relative RNA amounts were calculated according to the RNA amounts at time 0. (B) The relative interference efficiency of *atsRNAs*. We obtained the relative interference efficiency of each *atsRNAs* by normalizing the interference efficiency to relative RNA amounts.

**Figure S11.** The stability and relative interference efficiency of GY2, CY9 and their corresponding mRNA basepairing region null *atsRNA* mutants. (A) The stability of *atsRNAs* analyzed by Northern blot. The expression of *atsRNAs* was induced with 1 mM IPTG for 30 min, and then rifampicin was added. The incubation was continued further and cells were harvested at the indicated time points for RNA preparation. Total RNA was analyzed using probes specific for *atsRNAs* and 5S rRNA respectively. (B) The relative interference efficiency of *atsRNAs*. The relative RNA amounts were calculated according to the RNA amounts at time 0. We obtained the relative interference efficiency of each *atsRNAs* by normalizing the interference efficiency to relative RNA amounts.

**Figure S12.** The stability and relative interference efficiency of GY2, CY9 and their corresponding Hfq binding site null *atsRNA* mutants. (A) The stability of *atsRNAs* analyzed by Northern blot. The expression of *atsRNAs* was induced with 1 mM IPTG for 30 min, and then rifampicin was added. The incubation was continued further and cells were harvested at the indicated time points for RNA preparation. Total RNA was analyzed using probes specific for *atsRNAs* and 5S rRNA respectively. (B) The relative interference efficiency of *atsRNAs*. The relative RNA amounts were calculated according to the RNA amounts at time 0. We obtained the relative interference efficiency of each *atsRNAs* by normalizing the interference efficiency to relative RNA amounts.

**Figure S13.** Effect of *atsRNAs* on target *uidA* gene in *hfq* mutant strain GSO81 after

the transformation of a multicopy plasmid containing *hfq* gene. The *hfq* gene, including its promoter and transcription terminator, was cloned into pACYC177 vector which was compatible with the *atsRNA* expression vector. The activity of beta-glucuronidase was assayed after the expression of *atsRNA* was induced with 1mM IPTG for 30 min. Bacteria cells containing empty vector pRI were used as the control. Average values were from triplicate experiments with std values indicated.

**Figure S14.** Affinity of Hfq for *atsRNA* revealed by gel mobility shift assays. 5 nM labelled *atsRNAs* GY2 (A), Hfq-null-GY2 (B), CY9 (C) and Hfq-null-CY9 (D) were incubated in the absence (lane 1), in the presence of 5nM (lane 2), 10nM (lane 3), 20nM (lane 4), of Hfq protein, respectively. The free RNA and RNA-protein binding complex were indicated with F and B respectively.

**Figure S15.** The interaction of *atsRNA* and target mRNA in *vitro* with or without the aid of Hfq revealed by gel mobility shift assays. The target mRNA was synthesized in vitro using T7 RNA polymerase and PCR fragments as the templates. The length of the synthesized target mRNA was 146 nt for EGFP (from +1 to +146) and 137 nt for *uidA* (from +1 to +137), respectively. The primer sequences used for transcription in *vitro* were as follows: forward primer of EGFP gene, 5'-CTAATACGACTCACTATAGGGAGTCTAGAAATAATTTTGTTTAAC-3', reverse primer of EGFP gene, 5'-GATGGGCACCACCCCGGTGAAC-3'; forward primer of *uidA* gene, 5'-CTAATACGACTCACTATAGGGAGCTTAATGAGGAGTCCCTTATGT-3', reverse primer of *uidA* gene, 5'- TGTAACGCGCTTTCCCACCAACG-3'. 5 nM labelled *atsRNAs* GY2 (A) and CY9 (B) were incubated alone (lane 1), or with 0.5 nM unlabelled target mRNA (lane 2), 10 nM Hfq alone (lane 3), 0.5 nM unlabelled target mRNA and 10 nM Hfq together (lane 4). The free *atsRNAs*, complexes corresponding to *atsRNA*-target mRNA, *atsRNA*-Hfq and *atsRNA*-target mRNA-Hfq are indicated on the right.

**Figure S16.** Quantitative real-time PCR analysis of *uidA* mRNA in HAT103 (temperature sensitive *rne-1* mutant strain) containing *rne* gene when it was cultured at 42°C. The *rne* gene, including its promoter and transcription terminator, was cloned into pACYC177 vector which was compatible with the *atsRNA* expression vector. The mRNA level was detected after the expression of *atsRNAs* CY4 and CY9 were induced with 1 mM IPTG for 30 min. Bacterial cells containing empty vector pRI were used as the control. The value was normalized to the level of 16S rRNA in each sample.

**Figure S17.** The predicted secondary structure of *atsRNAs* targeting against identified essential genes. M series *atsRNAs* were designed to target against *murA* gene, T series *atsRNAs* were designed to target against *trmA* gene and Y series *atsRNAs* were designed to target against *ygjD* gene. The sequences of predicted pairing region (indicated with arrows) and Hfq binding site (indicated with asterisks) of *atsRNA* are marked. The detailed sequences of these *atsRNAs* were listed in Table S5. The secondary structure of *atsRNA* is predicted at 37°C by MFOLD program.

**Figure S18.** Quantitative real-time PCR analysis of target mRNA in MC4100. Quantitative real-time PCR analysis of *murA* mRNA (A), *trmA* mRNA (B) and *ygjD*

mRNA (C). IPTG was added to a final concentration of 0.1 mM to induce the expression of atsRNA when  $OD_{600}$  reached 0.5. The mRNA level was detected after the expression of atsRNAs was induced for 30 min. Bacterial cells containing empty vector pRI were used as the control. The value was normalized to the level of 16S rRNA in each sample.

**Figure S19.** Effect of atsRNAs on *hla* gene in *S. aureus*. (A) The effect of atsRNAs on  $\alpha$ -hemolysin activity. (B) Northern blot analysis of atsRNA transcripts targeting *hla* gene. Bacterial cells containing the empty vector pSB2035 were used as the control. The 5S rRNA was used as the loading control.

**Figure S20.** Effect of atsRNAs on SEA gene in *S. aureus*. (A) The effect of atsRNAs on *S. aureus* enterotoxin activity. (B) Upper: comparison of *S. aureus* enterotoxin A levels. Lower: Northern blot analysis of atsRNA transcripts targeting SEA gene. Bacterial cells containing the empty vector pSB2035 were used as the control. The 5S rRNA was used as the loading control.

**Figure S21.** Effect of atsRNA on growth rate of the host bacteria *S. aureus*. Growth curve of host bacteria *S. aureus* RN4220 after the expression of atsRNAs targeting against *hla* gene (A) or SEA gene (B), respectively. Bacterial cells containing empty vector pSB2035 were used as the control. Cells were grown in LB media with appropriate antibiotics at 37°C. Turbidity of the cultures was monitored at 600 nm.

# Supplementary Figure S1

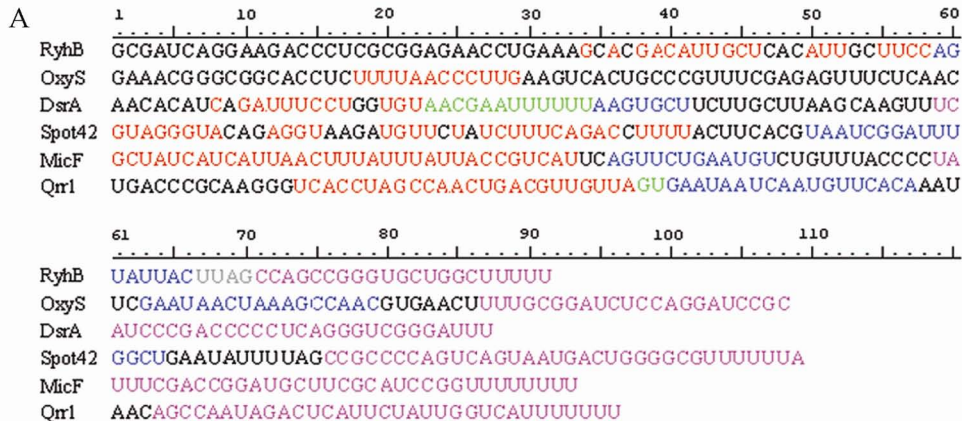





# Supplementary Figure S3

## A

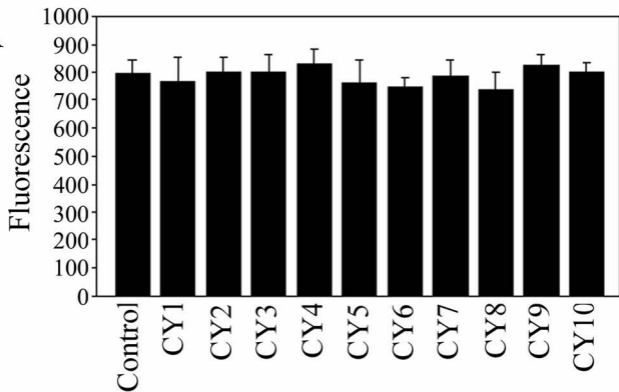

## B

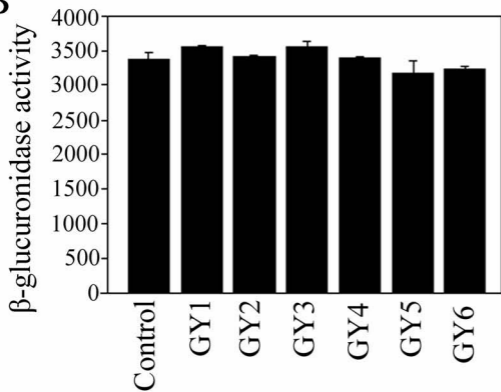

# Supplementary Figure S4

A

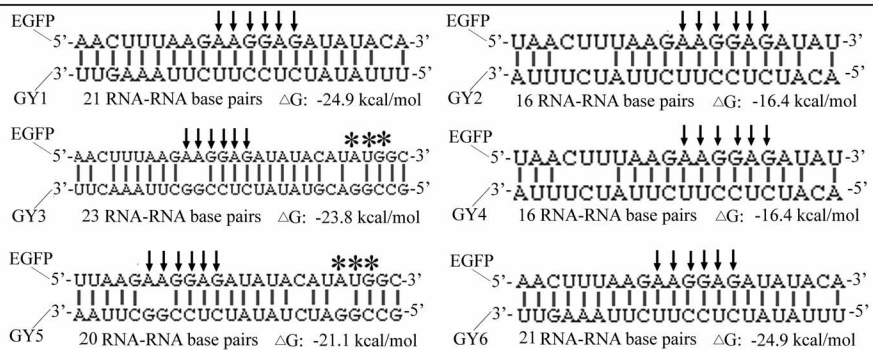

B

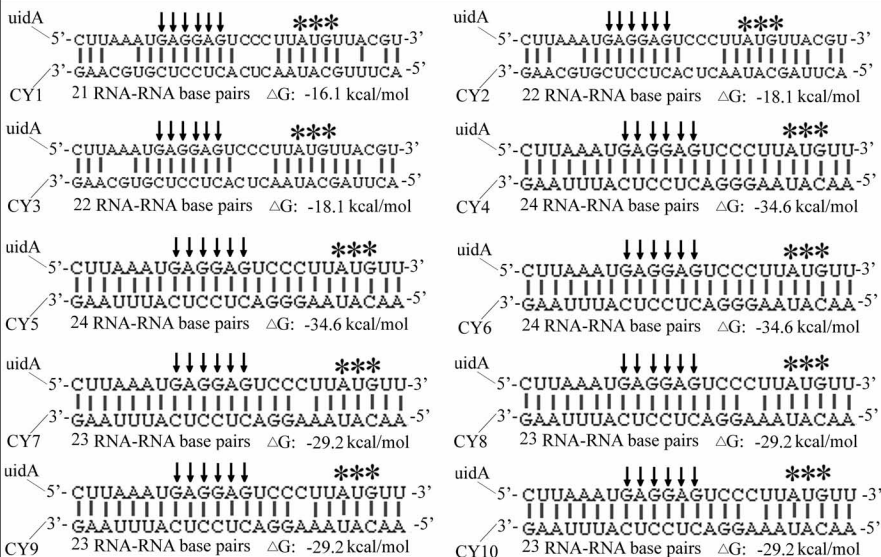

# Supplementary Figure S5

A

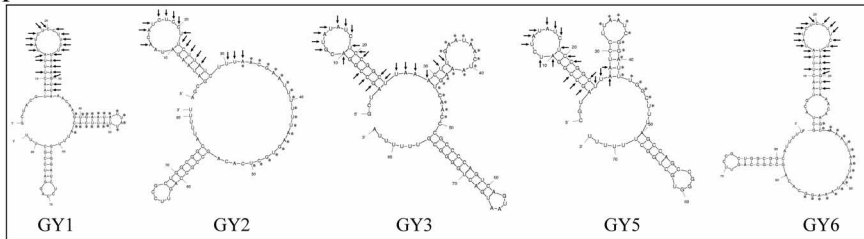

B

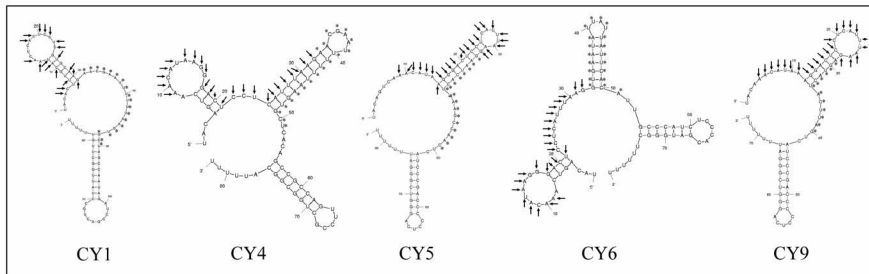

## Supplementary Figure S6

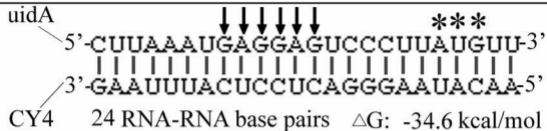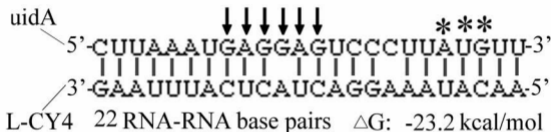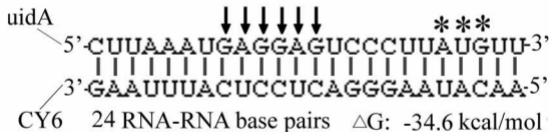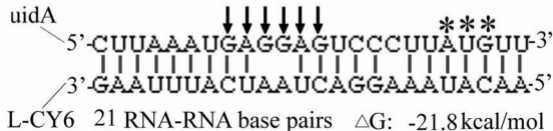

# Supplementary Figure S7

## A

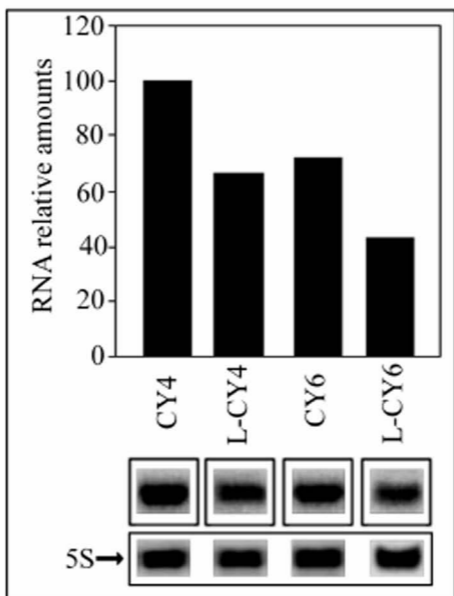

## B

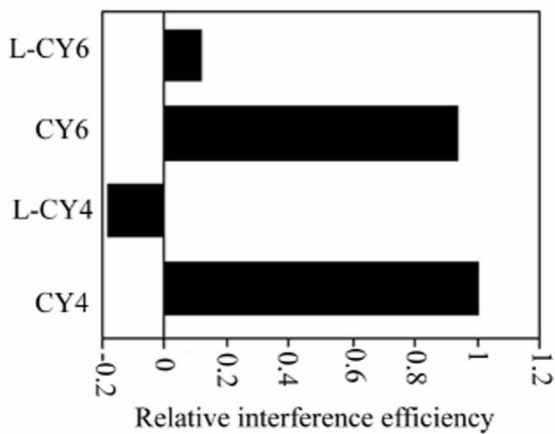

## Supplementary Figure S8

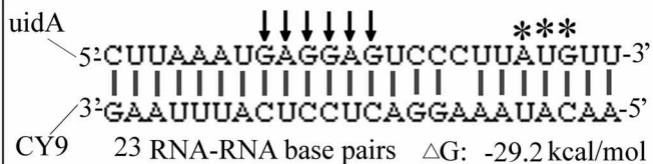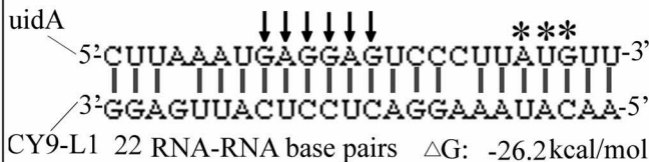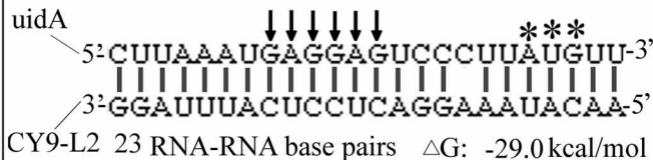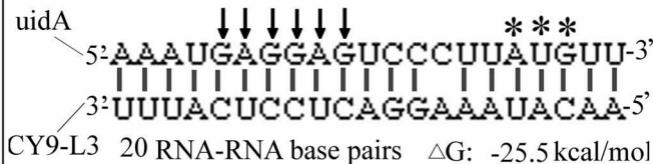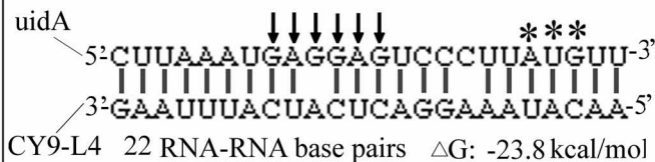

# Supplementary Figure S9

A

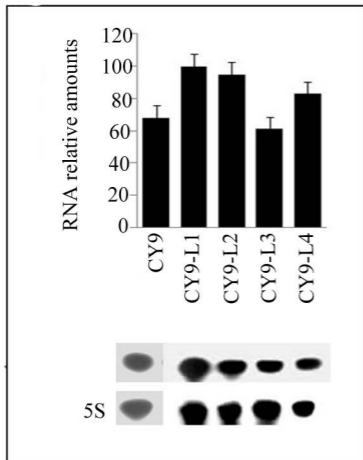

B

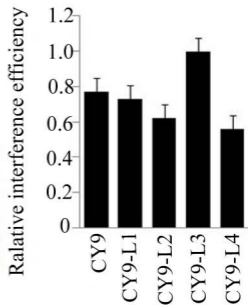

# Supplementary Figure S10

**A**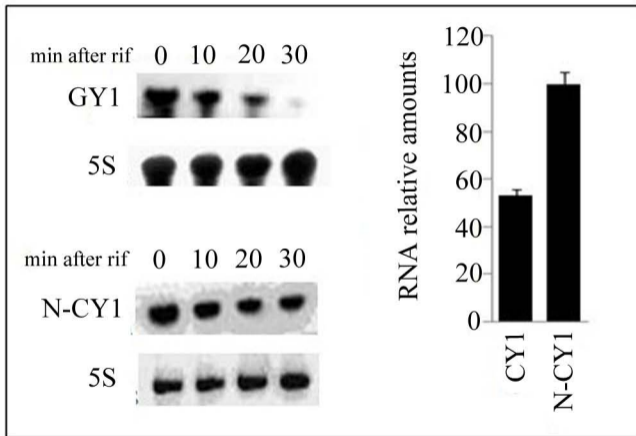**B**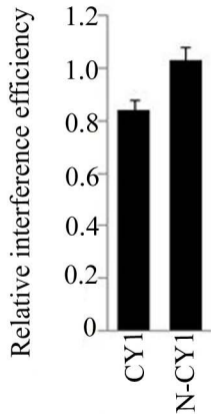



# Supplementary Figure S11

**A**

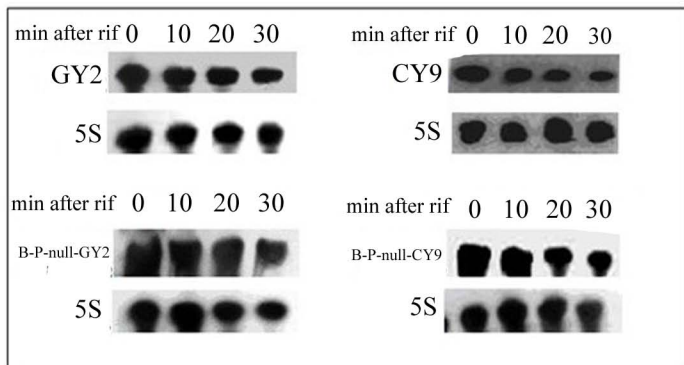

**B**

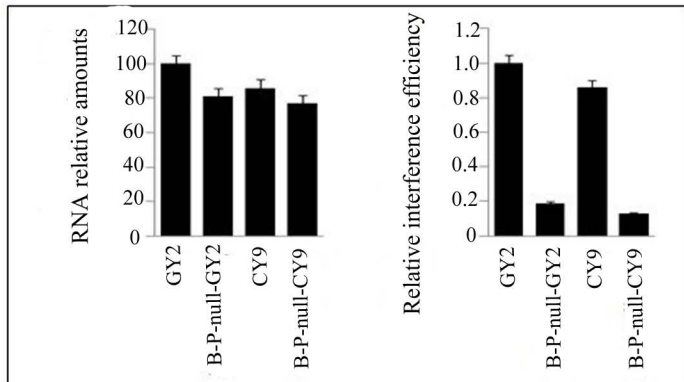

# Supplementary Figure S12

## A

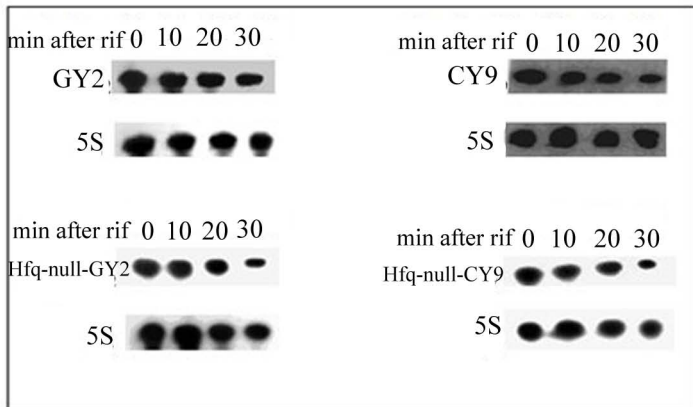

## B

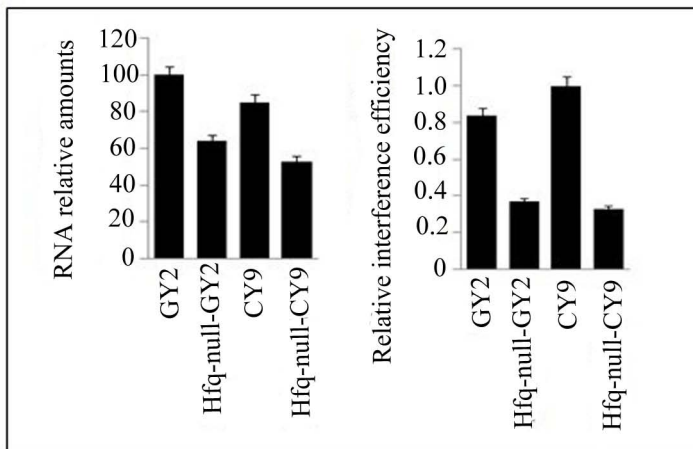

# Supplementary Figure S13

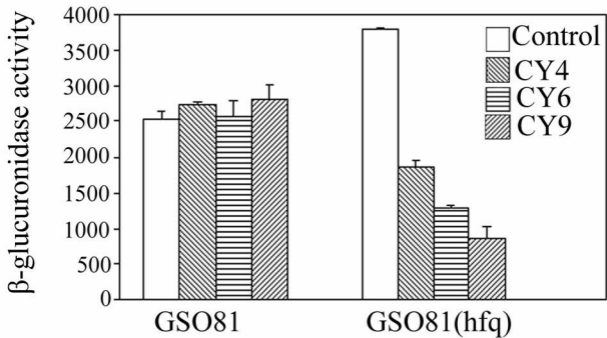

# Supplementary Figure S14

A-(GY2)

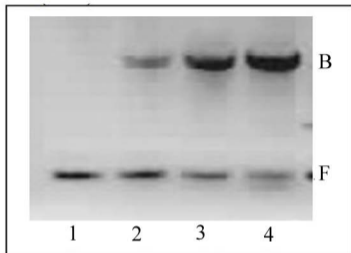

B-(Hfq-null-GY2)

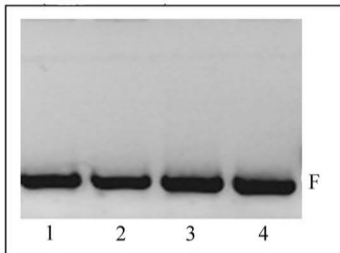

C-(CY9)

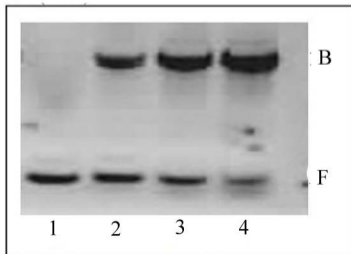

D-(Hfq-null-CY9)

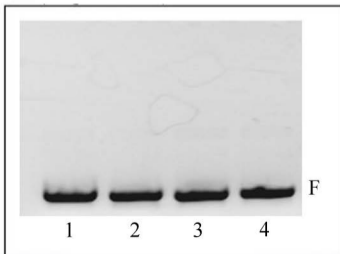

# Supplementary Figure S15

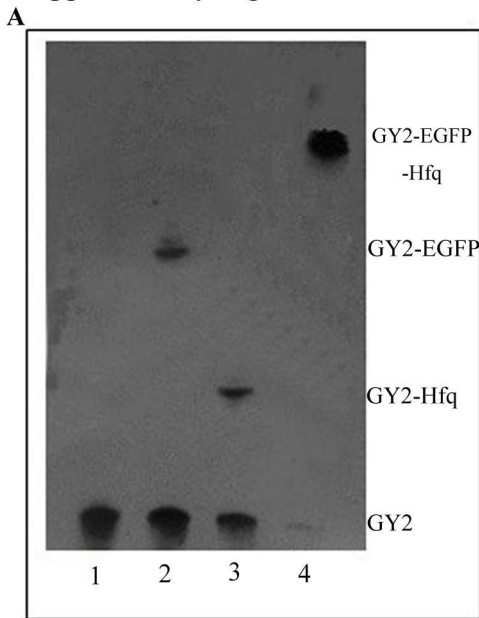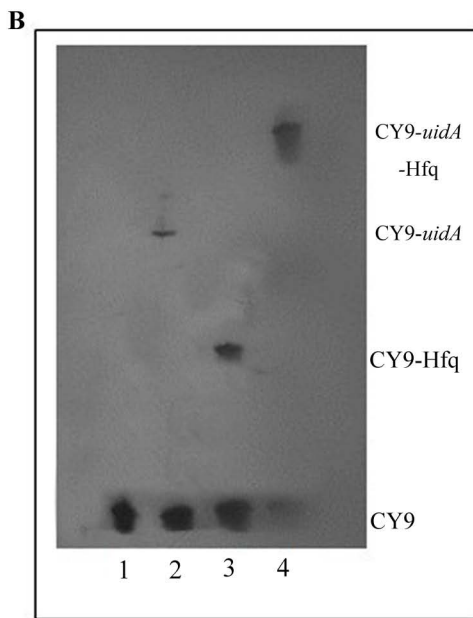

# Supplementary Figure 16

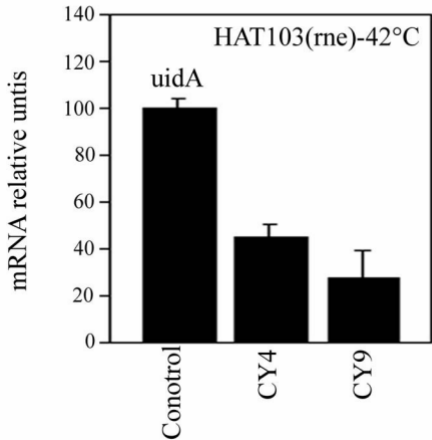

# Supplementary Figure S17

A

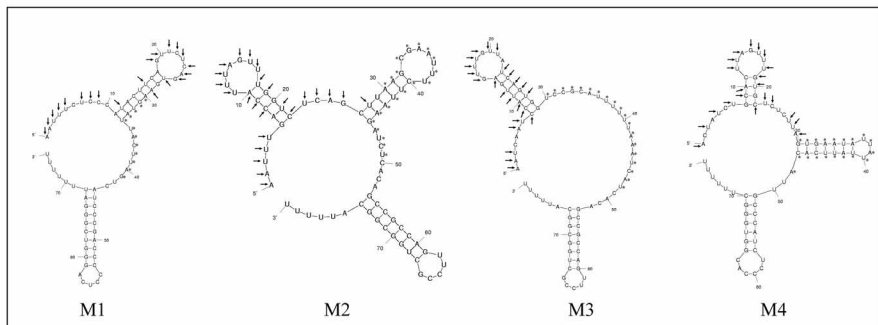

B

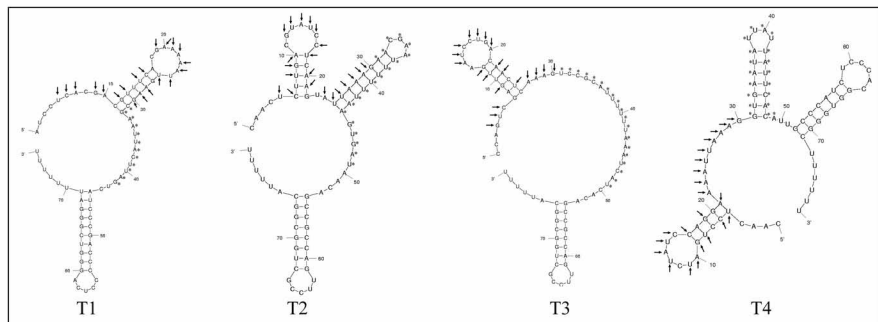

C

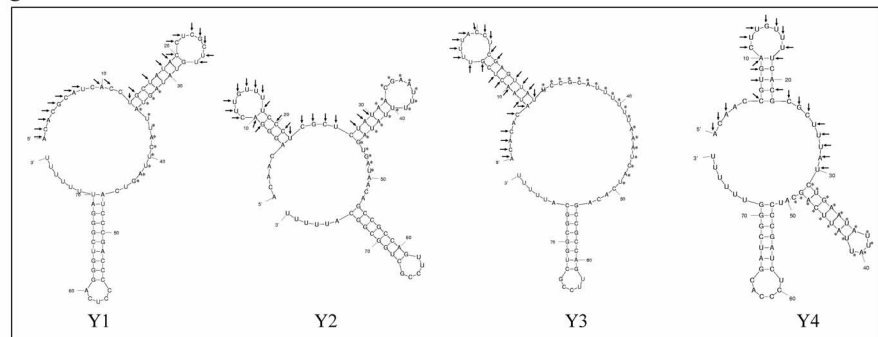

# Supplementary Figure S18

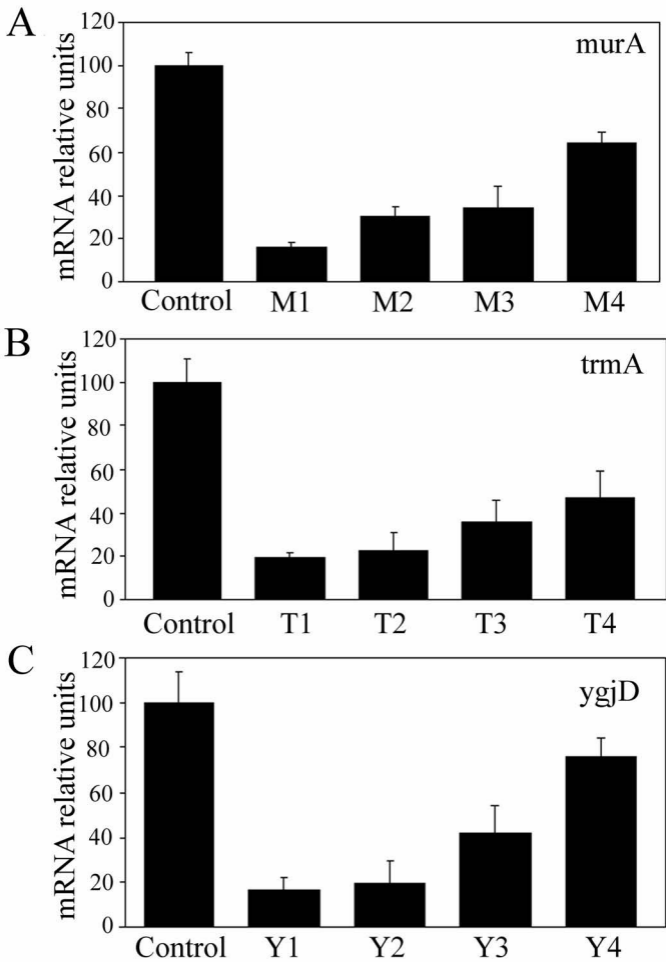



# Supplementary Figure S19

## A

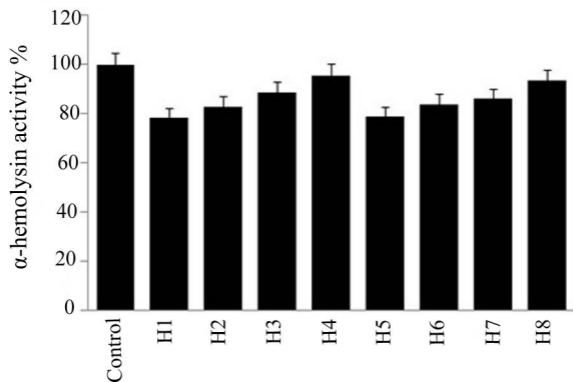

## B

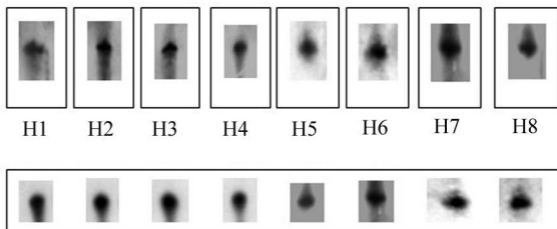

# Supplementary Figure S20

## A

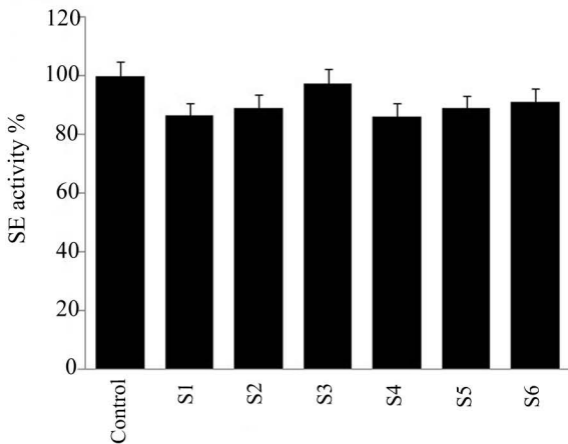

## B

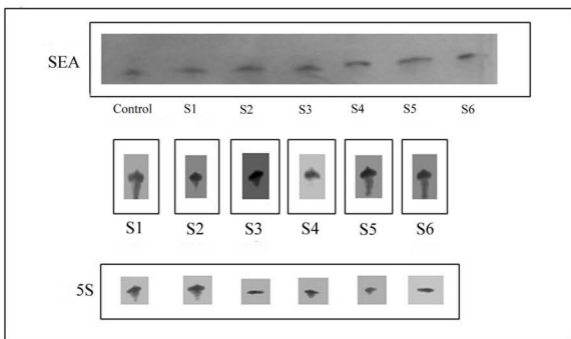



## Supplementary Tables

**Table S1** Sequence of atsRNA targeting against EGFP gene

| Name | Sequences (5'-3')                                                                               | Source of Hfq binding site | Source of terminator |
|------|-------------------------------------------------------------------------------------------------|----------------------------|----------------------|
| GY1  | GCUACGUAACUUUAUAUCUCCUUCUUA<br>AAGUUAACAAGUGAAUAUUUUAUUC<br>ACAUUUGCGGAUCUCCAGGAUCCGCUU<br>U    | Qrr1                       | OxyS                 |
| GY2  | AGCGAUAAGAUACAUCUCCUUCUUAU<br>CUUUACGAAUUUUUAAGUGCUCACA<br>GCCGCCAGUCCGCUGGCGGCAUUUUU           | DsrA                       | TrpA                 |
| GY3  | GCUAGCCGGACGUAUAUCUCCGGCUUA<br>AACUUGAAUAACUAAAGUCAACCCGCC<br>CCAGUCAGUAAUGACUGGGGCGUUUUU<br>UA | OxyS                       | Spot42               |
| GY4  | AGCGAUAAGAUACAUCUCCUUCUUAU<br>CUUUAGUAUUACUAGUCAUCCCGACC<br>CCCUCAGGGUCGGGAUUUUUUU              | RyhB                       | DsrA                 |
| GY5  | CGUAGCCGGAUCUAUAUCUCCGGCUUA<br>AUCCUUAUUCGGAUUUGGCUUUAGCCA<br>GCCGGGUGCUGGCUUUUUU               | Spot42                     | RyhB                 |
| GY6  | GCUACGUAACUUUAUAUCUCCUUCUUA<br>AAGUUAACAAGCAAUAUAUAUAAA<br>GGCACAGCCGCCAGUCCGCUGGCGGC<br>AUUUUU | SodB                       | TrpA                 |

The sequences of GY series atsRNAs (targeted against EGFP gene) were listed above. The atsRNAs sequences were composed of three elements: mRNA basepairing sequences (red), Hfq binding sites (green) and Rho-independent terminators (blue). The three elements of atsRNA were color labeled to make it easy to discern the three modules of atsRNA. The sources of Hfq binding site and Rho-independent terminator from natural *trans*-encoded sRNAs were also listed in this table. In some cases, the sequences of Hfq binding site and Rho-independent terminator need to be adjusted so that the secondary structure of atsRNA meets our designing principle.

**Table S2** Sequence of *atsRNA* targeting against *uidA* gene

|     |                                                                                                     |      |        |
|-----|-----------------------------------------------------------------------------------------------------|------|--------|
| CY1 | UACACUUUGCAU AACUCACUCCUCGUGC<br>AAGAACGAAUUUUUAAGUGCUAGCCA<br>AUAGA UCCGACUGCCUAUUGGCUUGUU<br>UUUU | DsrA | Qrr1   |
| CY2 | UACACUUAGCAU AACUCACUCCUCGUGC<br>AAGGAAUAACUAAAGCCAACUCAUCCCG<br>ACCCUCAGGGUCGGGAUUUUUUU            | OxyS | DsrA   |
| CY3 | UACACUUAGCAU AACUCACUCCUCGUGC<br>AAGGUGAAUAUUAUUAUUCACACAG<br>CCGCCAGUCCGCUGGGCGGCAUUUUU            | Qrr1 | TrpA   |
| CY4 | UACAGUCAACAUAAGGGACUCCUCAU<br>UUAAGAACGAAUUUUUAAGUGCUCAC<br>AGCCGCCAGUCCGCUGGGCGGCAUUUUU            | DsrA | TrpA   |
| CY5 | UACAGUCAACAUAAGGGACUCCUCAU<br>UUAAGGAUCACUAAAGCCAACUCAUCC<br>CGACCCUCAGGGUCGGGAUUUUUUU              | OxyS | DsrA   |
| CY6 | UACAGUCAACAUAAGGGACUCCUCAU<br>UUAAGGUGAAUAUUAUUAUUCACAUUG<br>CCCAUCUCCACGAUGGGCUUUUUU               | Qrr1 | RprA   |
| CY7 | UACAGUCAACAUAAGGGACUCCUCAU<br>UUAAGAACGAAUUUUUAAGUGCUUUA<br>GCCAGCCGGGUGCUGGCUUUUUU                 | DsrA | RyhB   |
| CY8 | UACAAACAUAAGGGACUCCUCAUUUAA<br>GG                                                                   | OxyS | Spot42 |

|      |                                                                                 |      |      |
|------|---------------------------------------------------------------------------------|------|------|
|      | AAUAAACUAAAGCCAACCCGCCCCAGUC<br>AGUAAUGACUGGGGCGUUUUUA                          |      |      |
| CY9  | UACAAACAUAAGGACUCCUCAUUUA<br>AGAGUACUACUAGUCAUCCCGACCCC<br>CUCAGGGUCGGGAUUUUUUU | RyhB | DsrA |
| CY10 | UACAAACAUAAGGACUCCUCAUUUA<br>AGGCAAAUUAUAUAAGGUUUGCG<br>GAUCUCCAGGAUCCGCUUU     | sodB | OxyS |

The sequences of GY series atsRNAs CY series atsRNAs (targeted against *uidA* gene) were listed above. The atsRNAs sequences were composed of three elements: mRNA basepairing sequences (red), Hfq binding sites (green) and Rho-independent terminators (blue). The three elements of atsRNA were color labeled to make it easy to discern the three modules of atsRNA. The sources of Hfq binding site and Rho-independent terminator from natural *trans*-encoded sRNAs were also listed in this table. In some cases, the sequences of Hfq binding site and Rho-independent terminator need to be adjusted so that the secondary structure of atsRNA meets our designing principle.

**Table S3** Sequence of atsRNA and their corresponding atsRNA mutants

| Name   | Sequences (5'-3')                                                                           |
|--------|---------------------------------------------------------------------------------------------|
| CY4    | UACAGUCAAAACAUAAGGGACUCCUCAUUUAAGAACGAAUU<br>UUUUAAGUGCUCACAGCCGCCAGUUCCGCUGGCGGCAUUU<br>UU |
| L-CY4  | UACAAACAAACAUAAGGGACUACUCAUUUAAGAACGAAUU<br>UUUUAAGUGCUCACAGCCGCCAGUUCCGCUGGCGGCAUUU<br>UU  |
| CY6    | UACAGUCAAAACAUAAGGGACUCCUCAUUUAAGGUGAAUAU<br>UAUUAUUCACAUUGCCCAUCUCCACGAUGGGCUUUUUU         |
| L-CY6  | UACAAACAAACAUAAGGGACUAAUCAUUUAAGGUGAAUAU<br>UAUUAUUCACAUUGCCCAUCUCCACGAUGGGCUUUUUU          |
| CY9    | UACAAACAUAAGGGACUCCUCAUUUAAGAGUACUACUUAG<br>UCAUCCCGACCCCCUCAGGGUCGGGAUUUUUUU               |
| CY9-L1 | UACAAACAUAAGGGACUCCUCAUUGAGGAGUACUACUUAG<br>UCAUCCCGACCCCCUCAGGGUCGGGAUUUUUUU               |
| CY9-L2 | UACAAACAUAAGGGACUCCUCAUUUAGGAGUACUACUUAG<br>UCAUCCCGACCCCCUCAGGGUCGGGAUUUUUUU               |
| CY9-L3 | UACAAACAUAAGGGACUCCUCAUUUCGGAGUACUACUUAG<br>UCAUCCCGACCCCCUCAGGGUCGGGAUUUUUUU               |



|        |                                                                                                                |
|--------|----------------------------------------------------------------------------------------------------------------|
| CY9-L4 | UACAAACAUA AAGGACUCAUCAUUUAAGUGUCCUACUUAGUCA<br>UCCCGACCCCCUCAGGGUCGGGAUUUUUUU                                 |
| CY1    | UACACUUUGCAUAACUCACUCCUCGUGCAAGACGAAUUUUUU<br>AAGUGCUAGCCAAUAGA UCCGACUGCCAUUGGCUUGUUUUUU                      |
| N-CY1  | UAGUACAACAUCGUACAAUACACUUUGCAUAACUCACUCCUCG<br>UGCAAGACGAAUUUUUAAGUGCUAGCCAAUAGA UCCGACU<br>GCCAUUGGCUUGUUUUUU |

The sequences of *atsRNAs* (including CY4, CY6, CY9 and CY1) and their corresponding *atsRNA* mutants (including L-CY4, L-CY6, CY9-L1, CY9-L2, CY9-L3, CY9-L4 and N-CY1) were listed above. Compared with the corresponding *atsRNAs*, L-CY4 and L-CY6 lost the stem loop of mRNA basepairing region in secondary structure. CY9-L1, CY9-L2, CY9-L3 and CY9-L4 were CY9 mutants with different number of unpaired nucleotides in the loop structure of mRNA basepairing region. The Hfq binding site and Rho-independent terminator remained constant in these mutants. N-CY1 was constructed by adding a 5' stem-loop structure without pairing sequence with target mRNA. The mutant N-CY1 had the same mRNA basepairing region, Hfq binding site and Rho-independent terminator with that of CY1. The *atsRNAs* sequences were composed of three elements: mRNA basepairing sequences (red), Hfq binding sites (green) and Rho-independent terminators (blue).

**Table S4** Sequence of GY2, CY9 and their corresponding mutants

| Name             | Sequences (5'-3')                                                                    |
|------------------|--------------------------------------------------------------------------------------|
| GY2              | AGCGAUAAGAUACAUCUCCUUCUUAUCUUUACGAAUUUUUAAG<br>UGCUCACAGCCGCCAGUUCCGCUGGCGGCAUUUUU   |
| B-P-null-<br>GY2 | CAGAGCGGCUACUGUGCAUUAAGCCGCUGCGAACGAAUUUUUAAG<br>UGCUCACAGCCGCCAGUUCCGCUGGCGGCAUUUUU |
| Hfq-null-<br>GY2 | AGCGAUAAGAUACAUCUCCUUCUUAUCUUUACCCACCCCACCCCG<br>CACCACAGCCGCCAGUUCCGCUGGCGGCAUUUUU  |
| CY9              | UACAAACAUAAGGACUCCUCAUUUAAGAGUACUACUAGUCAUCC<br>CGACCCCUACAGGGUCGGGAUUUUUUU          |
| B-P-null-<br>CY9 | UACACCGCACCAGCACUCUAACCUCUUGAGUACUACUAGUCAUCC<br>GACCCCUACAGGGUCGGGAUUUUUUU          |
| Hfq-null-<br>CY9 | UACAAACAUAAGGACCCUCAUUUAAGGGUCCUGCCGGCUCAUCC<br>CGACCCCUACAGGGUCGGGAUUUUUUU          |

The *atsRNA* mutants B-P-null-GY2 and Hfq-null-GY2 were designed based on GY2 and the mutants B-P-null-CY9 and Hfq-null-CY9 were designed based on CY9. Compared with the corresponding *atsRNAs*, the mRNA basepairing regions of B-P-null-GY2 and B-P-null-CY9 were non-pairing sequences with target mRNAs and the Hfq binding sites of Hfq-null-GY2 and Hfq-null-CY9 were GC rich sequences. Furthermore, the two other modules of *atsRNA* remained constant during this mutation. The *atsRNAs* sequences were composed of three elements: mRNA basepairing sequences (red), Hfq binding sites (green) and Rho-independent terminators (blue).

**Table S5** Sequence of atsRNA targeting against essential gene

| Name | Sequences (5'-3')                                                                       | Source of Hfq binding site | Source of terminator |
|------|-----------------------------------------------------------------------------------------|----------------------------|----------------------|
| M1   | AAUUUCUCCCAUACUUCAGUUCUCAGU<br>GAAGUAUUACUUGUCAUCCCGACCCC<br>CUCAGGGUCGGGAUUUUUUU       | RyhB                       | DsrA                 |
| M2   | AAUUUGACCAUUUAGUUUGGUCUCAGC<br>UUAAGCGAAUUUCUUAAGAUCUCACAG<br>CCGCCAGUCCGCUGGCGGCAUUUUU | DsrA                       | TrpA                 |
| M3   | AAUCAAUCCAUGAGUUUGUUAUCAG<br>UGGUCCGCAUUUUUAAAUCAUCACAG<br>CCGCCAGUCCGCUGGCGGCAUUUUU    | DsrA                       | TrpA                 |
| M4   | ACUAUCUGCACUAGUUUGUGCUCUCU<br>UAGUGAAUAUUAUUAUUCACAUGCCC<br>AUCUCCACGGUGGGCUUUUUU       | Qrr1                       | RprA                 |
| T1   | AUCCUCACGACGUUCACGAAAAUUG<br>AAGCGAAUUACUUGUCAUCCCGACCC<br>CCUCAGGGUCGGGAUUUUUUU        | RyhB                       | DsrA                 |
| T2   | CAACUCUUGACGUAUCCUCAAGUAUUA<br>AAGAACGAAUUUUUUAAGUGAUAACA<br>GCCGCCAGUCCGCUGGCGGCAUUUUU | DsrA                       | TrpA                 |
| T3   | CCAGUCGAGUUGAAUCCUGACAACUCA<br>AA                                                       | DsrA                       | TrpA                 |

|    |                                                                                        |      |      |
|----|----------------------------------------------------------------------------------------|------|------|
|    | GUCCGCAUUUUUAAAUCAUCACAGCC<br>GCCAGUCCGCUGGCGGCAUUUUU                                  |      |      |
| T4 | CAACUCCUGAUCUAUCCAGGAAAUA<br>AAGGUGAAUAUUAUUAUUCACAUUGCC<br>CAUCUCCCACGGUGGGCUUUUUU    | Qrr1 | RprA |
| Y1 | ACACGCAUCACCUGCUAUACCUCGCUUG<br>UAUAGUAUUACUUAUAGUCAUCCCGACCC<br>CCUCAGGGUCGGGAUUUUUUU | RyhB | DsrA |
| Y2 | ACAACAGGGACUUGUUUCCCUCGCUC<br>UAUAACGAAUUUUUAUAGUGAUAACAG<br>CCGCCAGUCCGCUGGCGGCAUUUUU | DsrA | TrpA |
| Y3 | ACACACAUAACUCGUUUUACCUCGAGU<br>UAUCCGCAUUUUUAAAUCAUCACAG<br>CCGCCAGUCCGCUGGCGGCAUUUUU  | DsrA | TrpA |
| Y4 | ACAACCGUGACUUGUUUUCACGCGCUU<br>UAUCUGAAUAUUAUUAUUCAGCAUCCC<br>GAUCUCCCACGAUCGGGUUUUUU  | Qrr1 | DsrA |

The sequences of M series atsRNAs (targeting against *murA* gene), T series atsRNAs (targeting against *trmA* gene) and Y series atsRNAs (targeting against *ygjD* gene) were listed above. The atsRNAs sequences were composed of three elements: mRNA basepairing sequences (red), Hfq binding sites (green) and Rho-independent terminators (blue). The sources of Hfq binding site and Rho-independent terminator from natural *trans*-encoded sRNAs were also listed in this table. In some cases, the sequences of Hfq binding site and Rho-independent terminator need to be adjusted so that the secondary structure of atsRNA meets our designing principle.

**Table S6** Sequence of atsRNA targeting against *hla* gene

| Name | Sequence(5'-3')                                                                                                        |
|------|------------------------------------------------------------------------------------------------------------------------|
| H-1  | <u>UACAAA</u> UAGAAGGAUGUAGAAAUGAACA <u>UCCUACU</u> UAGUC<br>A <u>UCCCGACCC</u> CCUCAGGGUCGGGAUUUUUU                   |
| H-2  | <u>UACACCGCACCAGCACUCUA</u> AACCUCUUGAGUAC <u>UACU</u> UAGUCAU<br>CCCGACCC <u>CCUCAGGGUCGGGAUUUUUU</u>                 |
| H-3  | <u>UACAAAUUUCUCCCAUACUUCAGUUC</u> CAGUGAAGUAUUACUUA<br>GUCA <u>UCCCGACCC</u> CCUCAGGGUCGGGAUUUUUU                      |
| H-4  | <u>ACGCAUCACCUGCUAUACCUCGCUUGUAUAGU</u> AUUACU <u>UAGUCA</u><br>UCCCGACCC <u>CCUCAGGGUCGGGAUUUUUU</u>                  |
| H-5  | <u>UACAAA</u> UAGAAGGAUGUAGAAAUGGUCCU <u>GCCGGC</u> UCAUCC<br>GACCC <u>CCUCAGGGUCGGGAUUUUUU</u>                        |
| H-6  | <u>UACACCGCACCAGCACUCUA</u> AACCUCUUGAGUACU <u>ACU</u> UAGUCAGG<br>UCCUGCCGGC <u>UCAUCCCGACCC</u> CCUCAGGGUCGGGAUUUUUU |
| H-7  | <u>UACAAA</u> UAGAAGGAUGUAGAAAUGAACA <u>UCCUACUGCAA</u> AU<br>UAAUAAUAAGGUUUGCGGAUCUCCAGGAUCCGCUU                      |
| H-8  | <u>UACAAA</u> UAGAAGGAUGUAGAAAUGAACA <u>UCCUACUAACGAA</u><br>UUUUUAAGUGCUUUAGCCAGCCGGGUGCUGGCUUUUU                     |

The sequences of H series atsRNAs (targeted against *hla* gene) were listed above. The atsRNAs sequences were composed of three elements: mRNA basepairing sequences (red), Hfq binding sites (green) and Rho-independent terminators (blue). The predicted hybrid pairing sequences with target mRNAs were marked (underlined sequences). The sources of Hfq binding site and Rho-independent

terminator from natural *trans*-encoded sRNAs were also listed in this table. In some cases, the sequences of Hfq binding site and Rho-independent terminator need to be adjusted so that the secondary structure of atsRNA meets our designing principle.

**Table S7** Sequence of atsRNA targeting against SEA gene

| Name | Sequence (5'-3')                                                                 |
|------|----------------------------------------------------------------------------------|
| S-1  | UACAUUUUCAUUUUGCUCACCUCUAAAGCAGUACUACUUAGUCAU<br>CCCGACCCCCUCAGGGUCGGGAUUUUUUU   |
| S-2  | UACACCGCACCAGCACUCUAACCUCUUGAGUACUACUUAGUCAUCC<br>CGACCCCCUCAGGGUCGGGAUUUUUUU    |
| S-3  | UACAUUUUACUUUUGCACACCUCUAAAGCAGUACUACUUAGUCAU<br>CCCGACCCCCUCAGGGUCGGGAUUUUUUU   |
| S-4  | UACAAAAACUUUUGCACACCUCUAAAGCAGUACUACUUAGUCAU<br>CCCGACCCCCUCAGGGUCGGGAUUUUUUU    |
| S-5  | UACAUUUUCAUUUUGCUCACCUCUAAAGCUUGUCCUGCCGGCUCA<br>UCCCGACCCCCUCAGGGUCGGGAUUUUUUU  |
| S-6  | UACAUUUUCAUUUUGCUCACCUCUAAAGCGUGAAUAUUAUUAUUC<br>ACAUUGCCCAUCUCCCACGAUGGGCUUUUUU |

The sequences of S series atsRNAs (targeted against SEA gene) were listed above. The atsRNAs sequences were composed of three elements: mRNA basepairing sequences (red), Hfq binding sites (green) and Rho-independent terminators (blue). The predicted hybrid pairing sequences with target mRNAs were marked (underlined sequences). The sources of Hfq binding site and Rho-independent terminator from natural *trans*-encoded sRNAs were also listed in this table. In some cases, the sequences of Hfq binding site and Rho-independent terminator need to be adjusted so that the secondary structure of atsRNA meets our designing principle.

**Table S8.** Summary of atsRNAs of *S. aureus* in this study

| Name | Sequence information |                                      |                               | dG(kcal/mol) <sup>e</sup> | Target | Inhibitory efficiency <sup>f</sup> |       |
|------|----------------------|--------------------------------------|-------------------------------|---------------------------|--------|------------------------------------|-------|
|      | Length <sup>a</sup>  | mRNA base-pairing region             | Hfq binding site <sup>d</sup> |                           |        |                                    |       |
|      | Length <sup>b</sup>  | Complementary sequences <sup>c</sup> |                               |                           |        |                                    |       |
| H-1  | 74nt                 | 28nt                                 | 22nt                          | 12nt                      | -27.8  | hla                                | 21.5% |
| H-2  | 72nt                 | 26nt                                 | 3nt                           | 12nt                      | -22.8  | hla                                | null  |
| H-3  | 77nt                 | 30nt                                 | 16nt                          | 14nt                      | -25.6  | hla                                | 16.9% |
| H-4  | 78nt                 | 30nt                                 | 10nt                          | 14nt                      | -25.6  | hla                                | 14.4% |
| H-5  | 78nt                 | 28nt                                 | 22nt                          | 0nt                       | -22.5  | hla                                | 20.9% |
| H-6  | 84nt                 | 28nt                                 | 15nt                          | 0nt                       | -22.8  | hla                                | 16.1% |
| H-7  | 81nt                 | 29nt                                 | 12nt                          | 14nt                      | -19.4  | hla                                | 13.9% |
| H-8  | 83nt                 | 29nt                                 | 12nt                          | 16nt                      | -15.1  | hla                                | 9.3%  |
| S-1  | 75nt                 | 30nt                                 | 23nt                          | 12nt                      | -21.3  | SEA                                | 18.3% |
| S-2  | 73nt                 | 28nt                                 | 5nt                           | 12nt                      | -22.8  | SEA                                | null  |
| S-3  | 74nt                 | 30nt                                 | 16nt                          | 12nt                      | -20.3  | SEA                                | 15.6% |
| S-4  | 75nt                 | 29nt                                 | 11nt                          | 14nt                      | -20.3  | SEA                                | 11.8% |
| S-5  | 75nt                 | 30nt                                 | 23nt                          | 0nt                       | -21.9  | SEA                                | 18.9% |
| S-6  | 76nt                 | 30nt                                 | 23nt                          | 14nt                      | -17.1  | SEA                                | 9.8%  |

<sup>a</sup> The full length of atsRNA. <sup>b</sup> The length of mRNA basepairing region of atsRNA. <sup>c</sup> The length of predicted complementary sequences between atsRNA and target mRNA. <sup>d</sup> The length of Hfq binding site of atsRNA. <sup>e</sup> The minimum free energy of atsRNA predicted at 37°C by MFOLD program. <sup>f</sup> The repression efficiency was calculated after the expression of each atsRNA for 30 min and bacterial cells containing empty vector pSB2035 was used as the control. The detailed sequences of these atsRNAs were listed in Supplementary Table S6 and 7.
